# Supplementary material for: The Effects of Viral Load Burden on Pregnancy Loss among HIV-Infected Women in the United States
Source: Hindawi journal article supplement (doi:10.1155/2015/362357), 2015-01-01
Supplement: f1 [file 362357.f1.pdf]

**Supplemental Table 1.** Univariate risk ratios and risk differences of the association between potential risk factors with pregnancy loss among HIV-infected women enrolled in the Women's Interagency HIV Study (WIHS) from October 1, 1994 to March 31, 2013 and their respective pregnancies meeting eligibility criteria for analysis 1 (N=461).

|                         | Pregnancy loss | Crude Univariate Associations |                      |
|-------------------------|----------------|-------------------------------|----------------------|
|                         | Losses/N       | RR (95% CI)                   | RD (95% CI)          |
| <b>Race</b>             |                |                               |                      |
| White                   | 24/93          | 1.                            | 0.                   |
| Black                   | 110/289        | 1.42 (0.98, 2.06)             | 0.11 (0.004, 0.22)   |
| Other*                  | 26/79          | 1.24 (0.77, 2.01)             | 0.06 (-0.08, 0.21)   |
| <b>Income/year†</b>     |                |                               |                      |
| <\$12,000               | 87/233         | 1.                            | 0.                   |
| \$12,001-\$36,000       | 52/152         | 0.92 (0.69, 1.23)             | -0.03 (-0.13, 0.07)  |
| >\$36,000               | 13/55          | 0.69 (0.42, 1.12)             | -0.11 (-0.24, 0.02)  |
| <b>CD4 count†</b>       |                |                               |                      |
| CD4≤500                 | 91/265         | 1.                            | 0.                   |
| CD4>500                 | 67/192         | 1.02 (0.78, 1.33)             | 0.01 (-0.08, 0.10)   |
| <b>Prior loss§</b>      |                |                               |                      |
| No                      | 90/324         | 1.                            | 0.                   |
| Yes                     | 70/137         | 1.86 (1.48, 2.35)             | 0.24 (0.15, 0.33)    |
| <b>Current smoking†</b> |                |                               |                      |
| No                      | 66/291         | 1.                            | 0.                   |
| Yes                     | 91/166         | 2.42 (1.87, 3.13)             | 0.32 (0.23, 0.41)    |
| <b>Maternal age</b>     |                |                               |                      |
| 19-29                   | 38/139         | 1.                            | 0.                   |
| 30-39                   | 91/258         | 1.33 (0.98, 1.80)             | 0.09 (-0.001, 0.17)  |
| 40-49                   | 28/60          | 1.72 (1.16, 2.54)             | 0.19 (0.04, 0.36)    |
| <b>ART use †</b>        |                |                               |                      |
| None                    | 77/136         | 1.                            | 0.                   |
| Mono/dual               | 19/75          | 0.43 (0.27, 0.68)             | -0.32 (-0.45, -0.18) |
| HAART‡                  | 64/249         | 0.46 (0.35, 0.60)             | -0.31 (-0.41, -0.20) |
| <b>NIDU†</b>            |                |                               |                      |
| No                      | 111/371        | 1.                            | 0.                   |
| Yes                     | 45/84          | 1.80 (1.38, 2.35)             | 0.23 (0.11, 0.35)    |

WIHS=Women's Interagency HIV Study, ART=antiretroviral therapy, HAART=highly-active antiretroviral therapy, VL=viral load, IDU=Injection drug use, NIDU=Non-injection drug use.

\* Includes unknown, Asian, Hispanic, Pacific-Islander, Native American, and Alaskan.

† Measured at the visit prior to the pregnancy outcome.

‡ HAART was defined according to the US Department of Health and Human Services/Kaiser Panel guidelines [29].

§ Self-reported previous miscarriage or stillbirth prior to and during WIHS enrollment.
